# Supplementary material for: Colloidal templating: seeded emulsion polymerization of a soluble shell with a controlled alkyne surface density
Source: Royal Society of Chemistry journal article supplement (doi:10.1039/c2sm25070e), 2012-01-01
Supplement: c2sm25070e.pdf [file c2sm25070e.pdf]

## SUPPORTING INFORMATION

### **Colloidal Templating: Seeded Emulsion Polymerization of a Soluble Shell with a Controlled Alkyne Surface Density**

Ryan D. Roeder, Parul Rungta, Volodymyr Tsyalkovskyy, Yurii Bandera, and Stephen H. Foulger\*

Center for Optical Materials Science and Engineering Technologies (COMSET)  
School of Materials Science and Engineering  
Clemson University, Clemson, SC 29634-0971, USA

\*To whom correspondence should be addressed; e-mail: [foulger@clemson.edu](mailto:foulger@clemson.edu)

## Synthesis of naphthalimide modified azido-pluronic (azPXD)

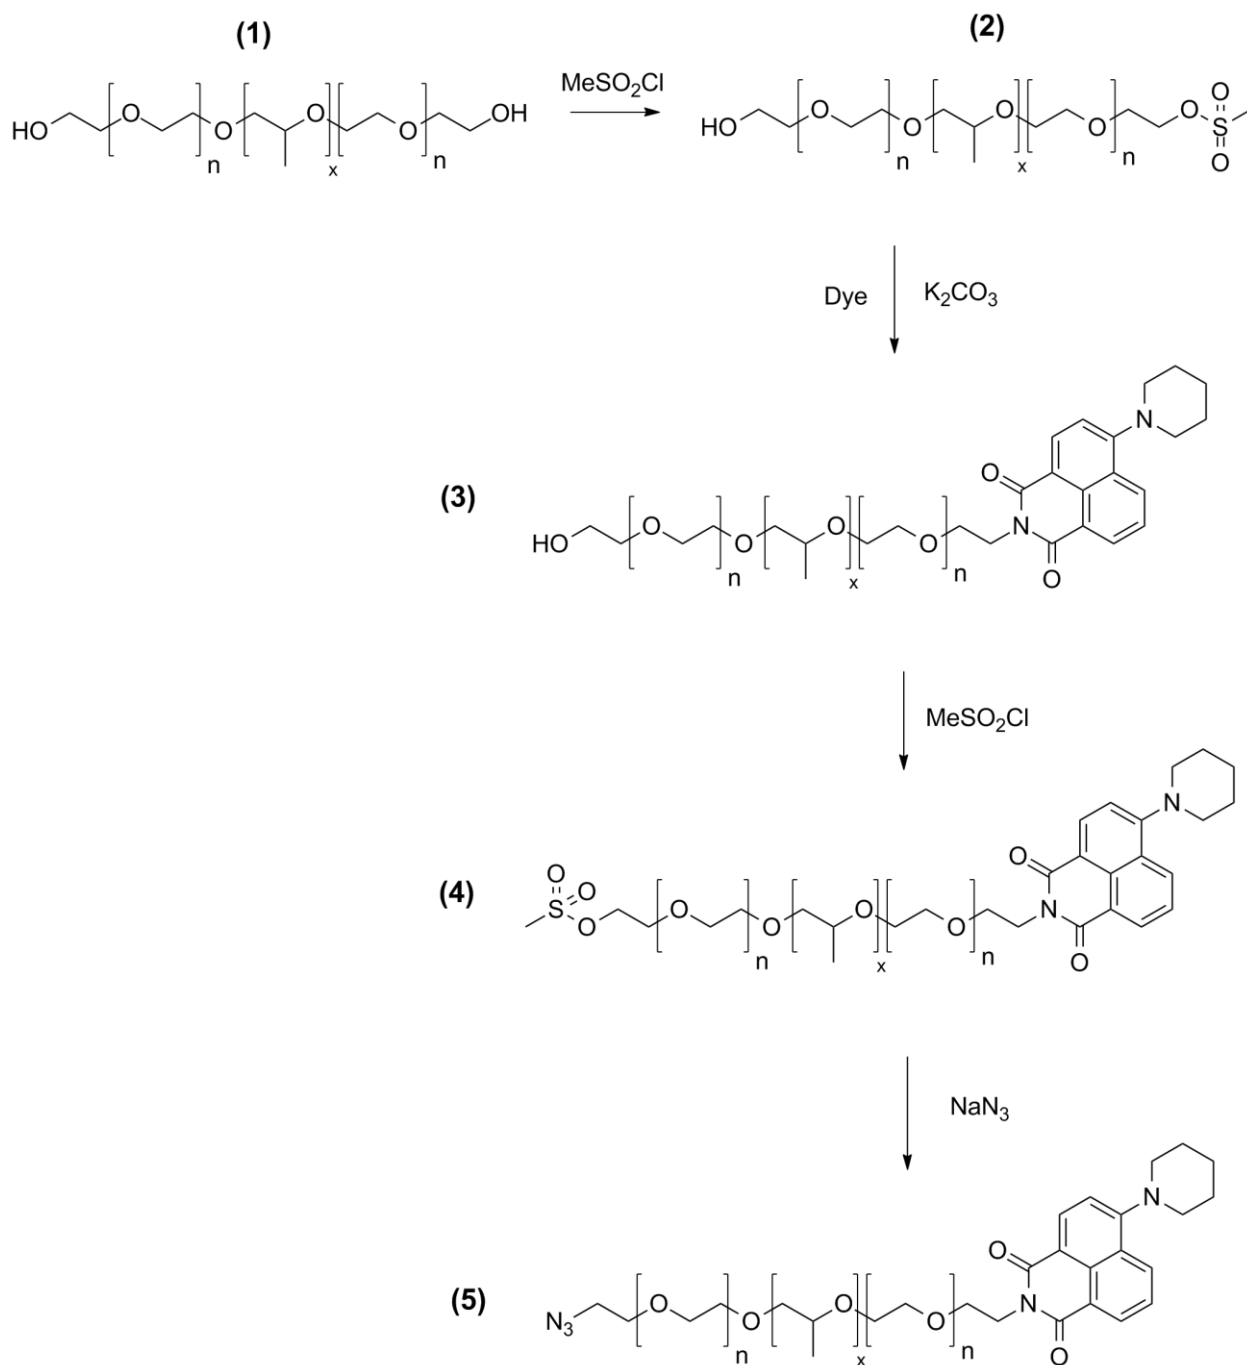

*Scheme A.* Reaction scheme for the modification of F-68 pluronic with a naphthalimide (6-Piperidin-1-yl-benzo[de]isoquinoline-1,3-dione) and an azide.

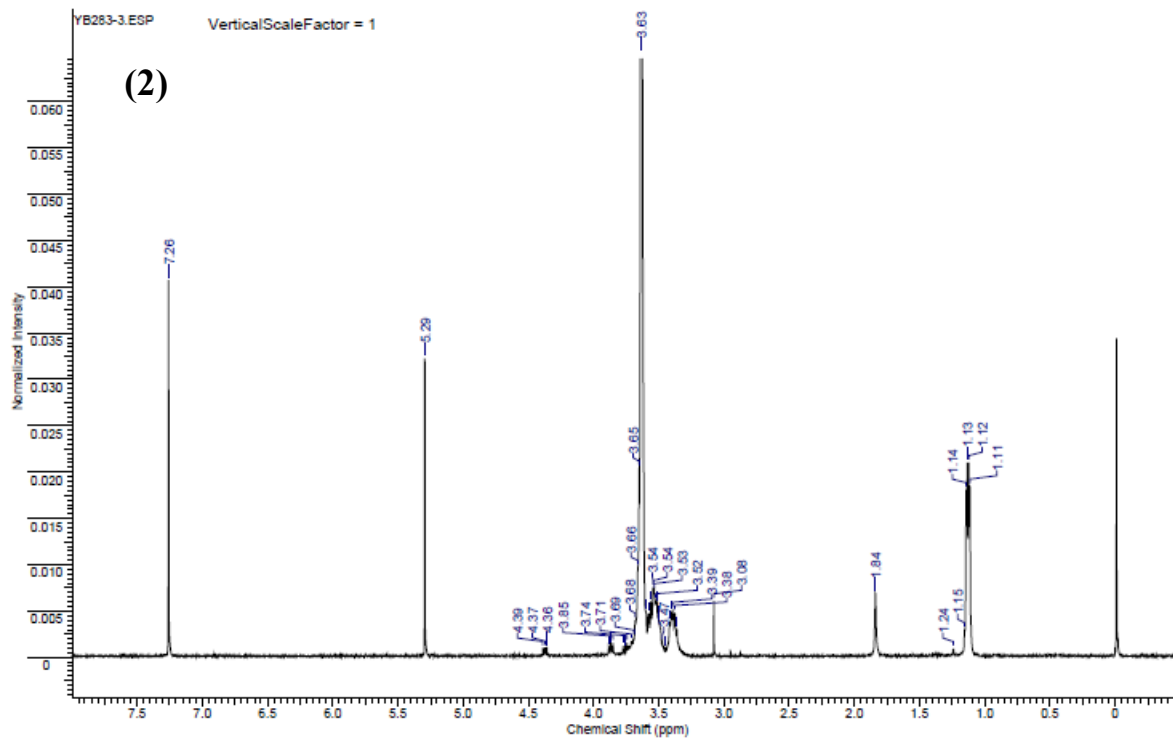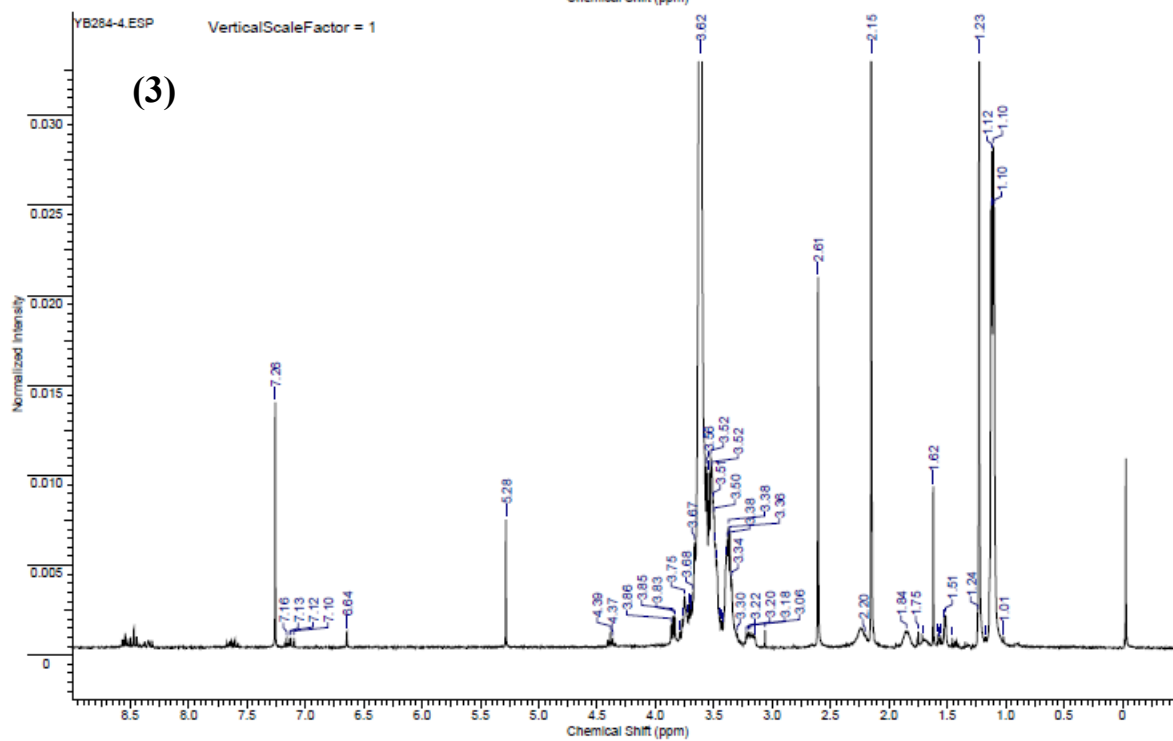

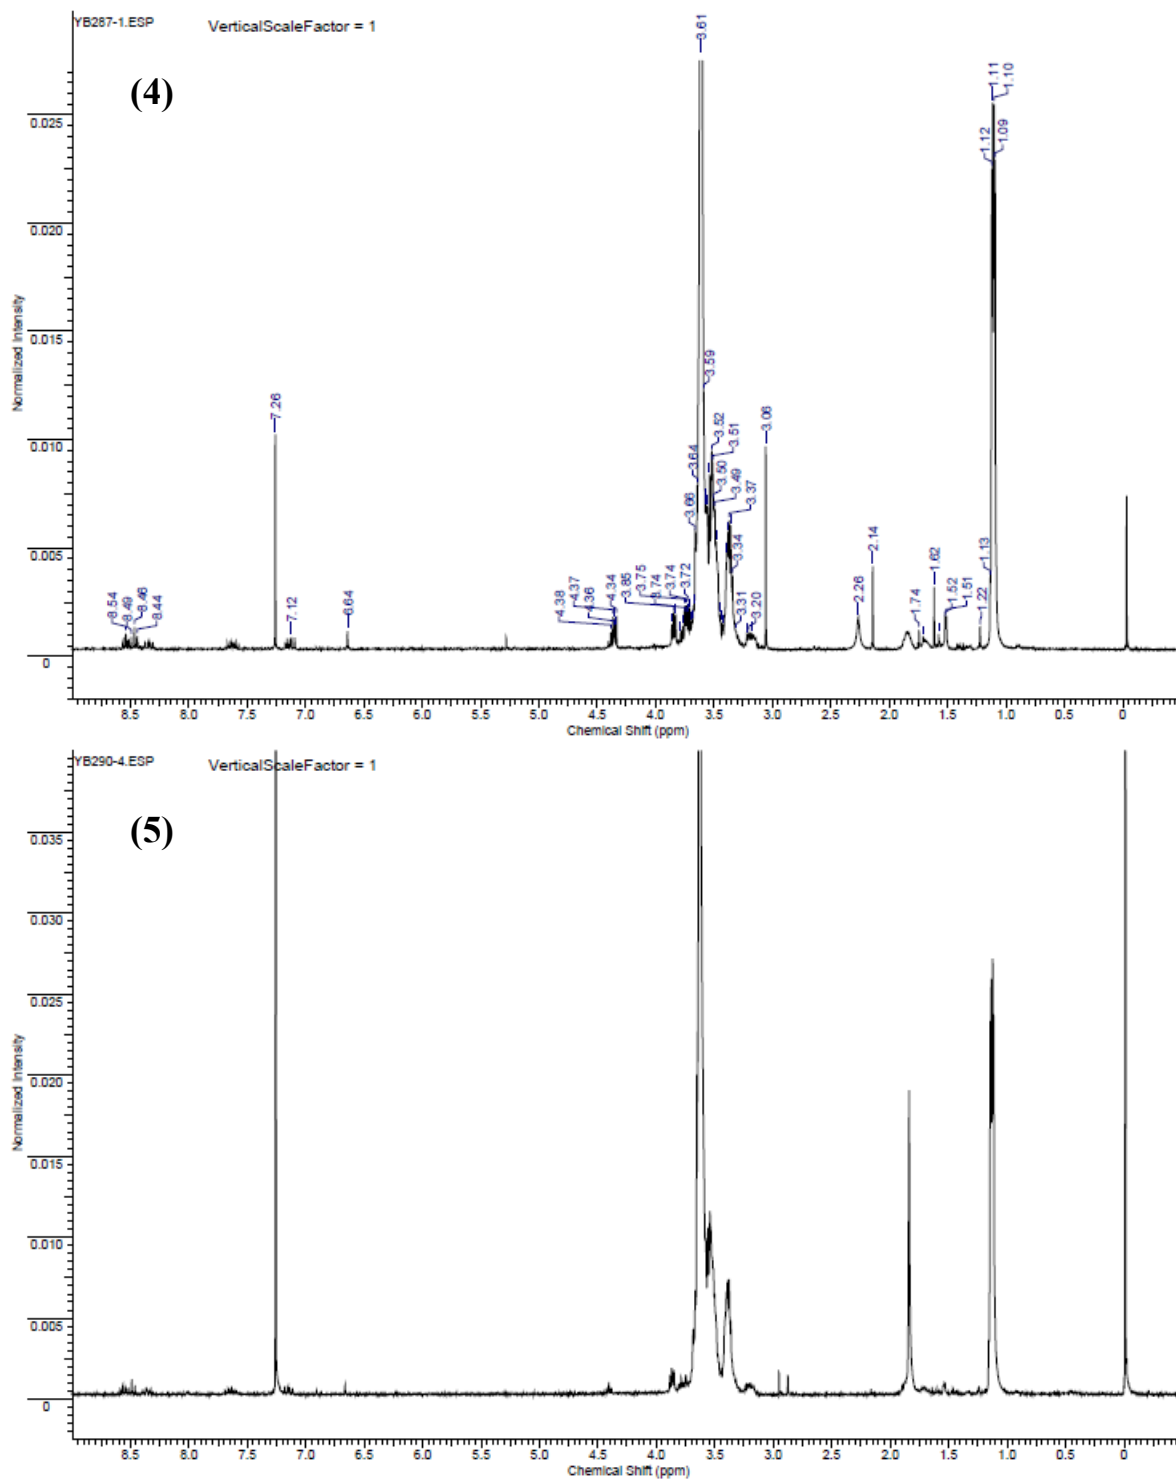

Figure A. Nuclear Magnetic Resonance (NMR) spectra of intermediate steps and final product in the synthesis of AzPXD.

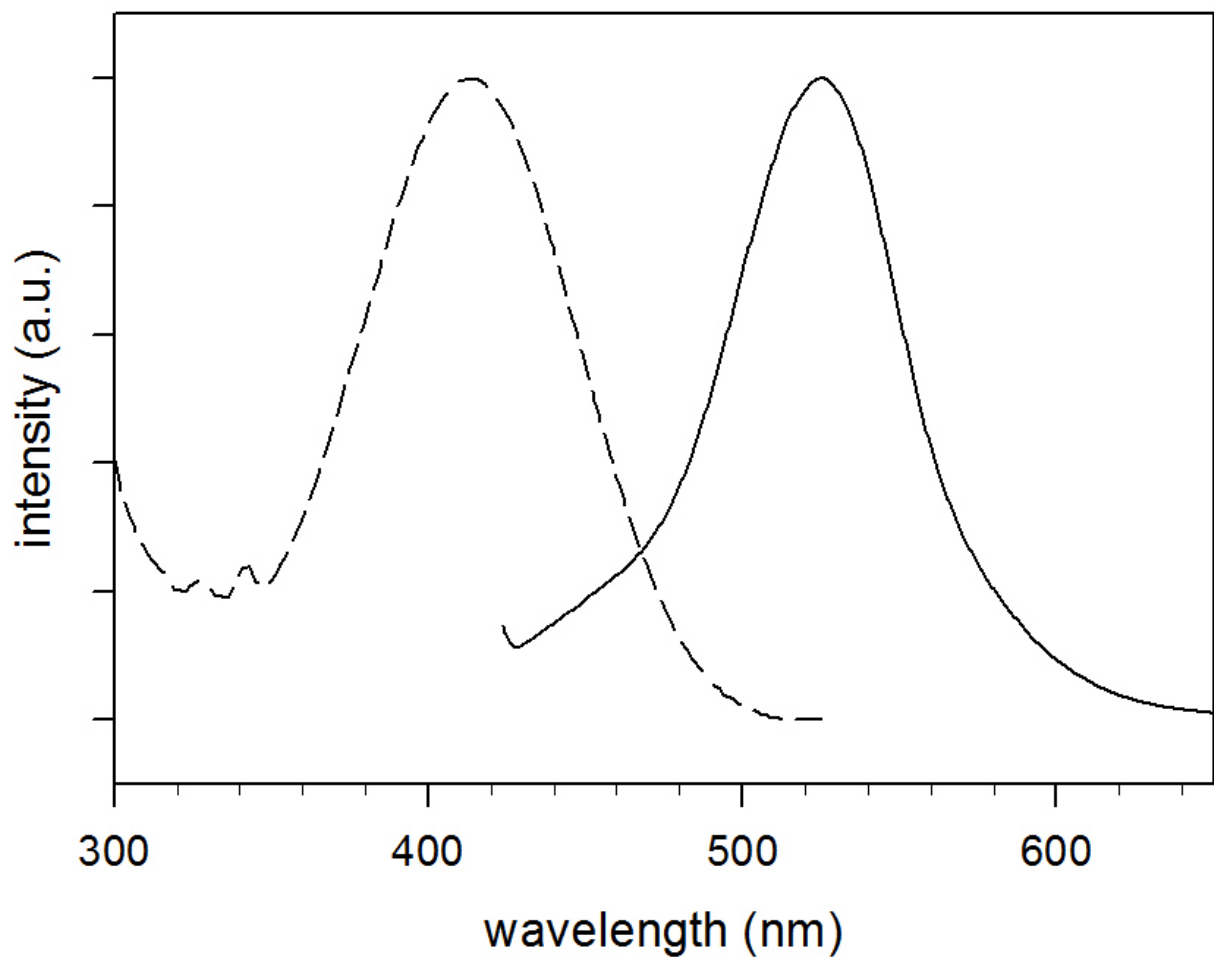

*Figure B.* UV-Vis (dash) and photoluminescence (solid) spectroscopy of naphthalimide modified azido-pluronic (azPXD). Absorbance spectrum was collected on a 5  $\mu\text{M}$  solution of AzPXD in methanol, absorbance maximum at 414 nm. Photoluminescence spectrum was collected on a 20  $\mu\text{M}$  solution of AzPXD in methanol, with excitation wavelength at 404 nm and emission maximum at 525 nm.

## Infrared (IR) Spectroscopy of Core-Shell Particles

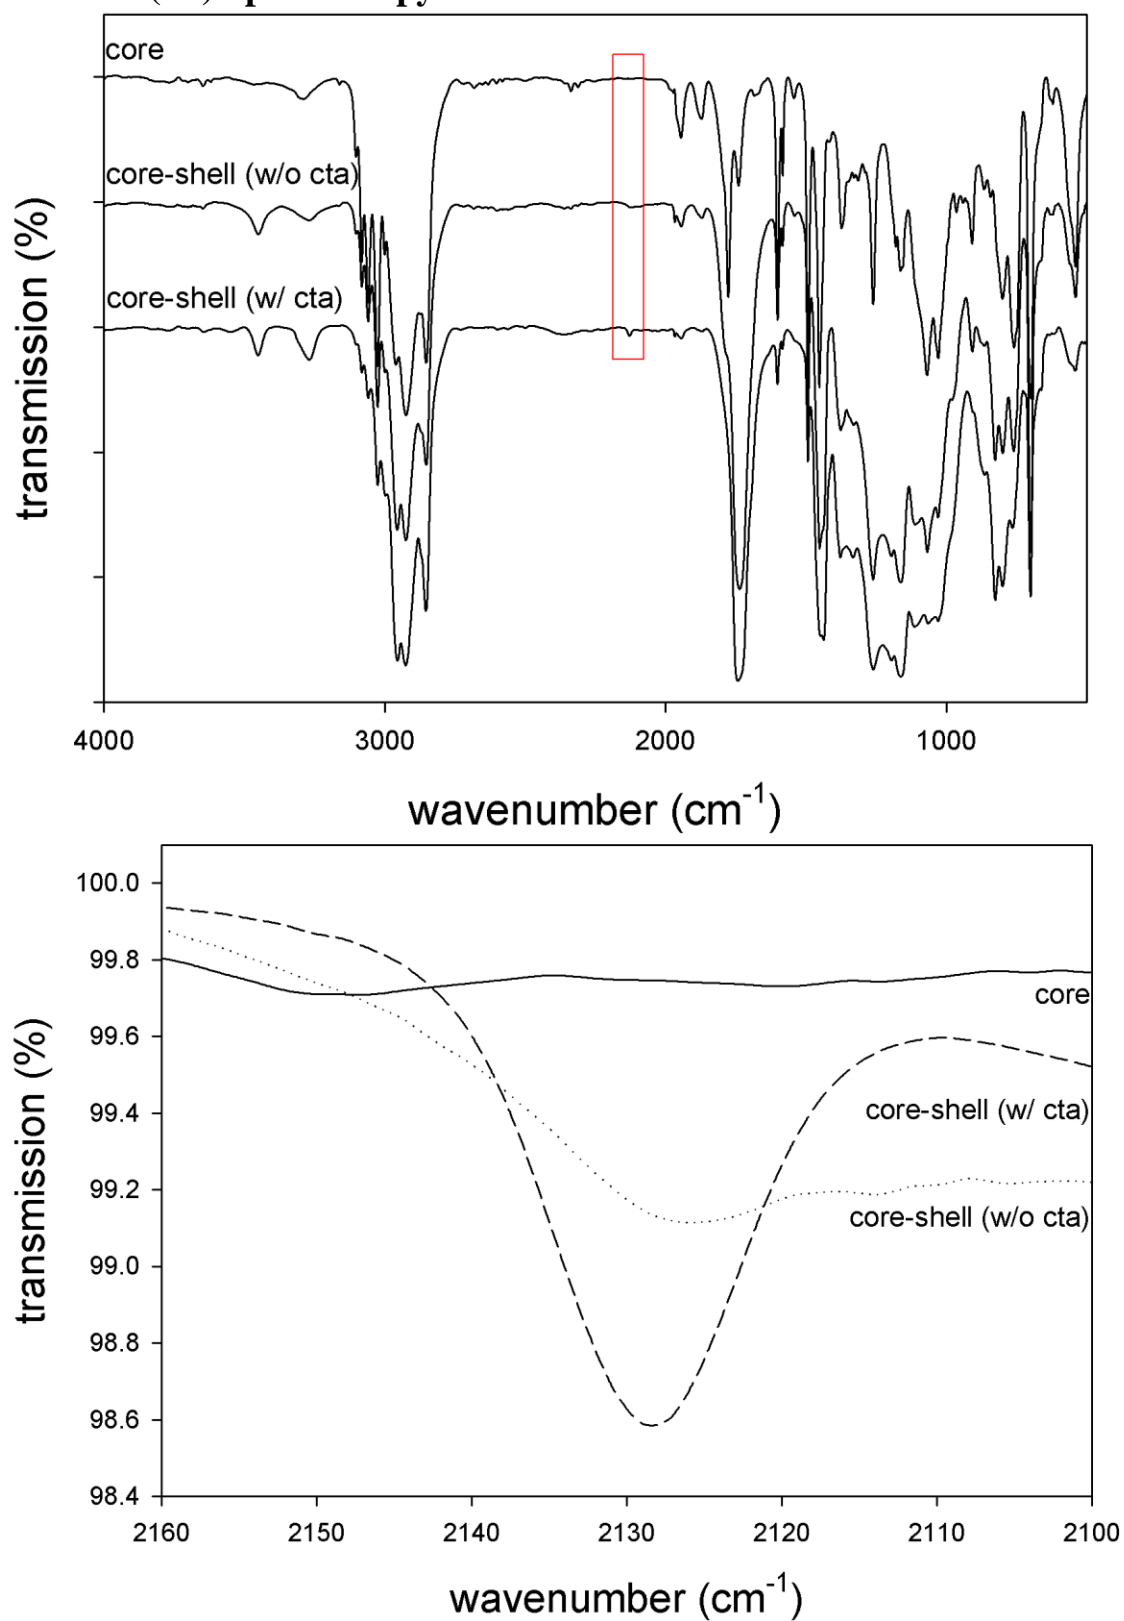

Figure C. IR spectra of core and core-shell particles. The second spectra focuses on the alkyne peak at ca.  $2130 \text{ cm}^{-1}$ , where only a peak for the shell polymerization that used a chain transfer agent is noticeable. Both polymer shells used 1% propargyl acrylate in the shell polymerization.
